# Supplementary material for: iMPTCE-Hnetwork: A Multilabel Classifier for Identifying Metabolic Pathway Types of Chemicals and Enzymes with a Heterogeneous Network
Source: Hindawi journal article supplement (doi:10.1155/2021/6683051), 2021-01-04
Supplement: f1 [file 6683051.f1.pdf]

**Table S1.** Chemicals and enzymes in each metabolic pathway type.

**1. Carbohydrate metabolism**

|              |              |              |              |              |
|--------------|--------------|--------------|--------------|--------------|
| CID000001060 | CID000439183 | CID000440641 | CID000439184 | CID000008629 |
| CID000444493 | CID000064689 | CID000010267 | CID000161227 | CID000000753 |
| CID000005793 | CID000439191 | CID000440936 | CID000439190 | CID000017473 |
| CID000000175 | CID000066370 | CID000440938 | CID000009290 | CID000135191 |
| CID000000970 | CID000000702 | CID000000051 | CID000439194 | CID000094715 |
| CID000001132 | CID000439278 | CID000001110 | CID000122357 | CID000439195 |
| CID000001005 | CID000439284 | CID000092133 | CID000091493 | CID000000756 |
| CID000000177 | CID000186004 | CID000444972 | CID000079014 | CID000439203 |
| CID000065533 | CID000439427 | CID000222656 | CID000439236 | CID000439204 |
| CID000000668 | CID000439503 | CID000000311 | CID005460448 | CID000439205 |
| CID000439168 | CID000440568 | CID000001198 | CID000439288 | CID000439215 |
| CID000107689 | CID000440969 | CID000643757 | CID005460191 | CID000006912 |
| CID000006251 | CID011020241 | CID000000972 | CID000439452 | CID000000523 |
| CID000439231 | CID005459849 | CID000440649 | CID000073563 | CID024892720 |
| CID000000870 | CID000439290 | CID000439167 | CID000000046 | CID000439240 |
| CID000025310 | CID000192781 | CID000007339 | CID000165007 | CID005460056 |
| CID000439279 | CID000033037 | CID000005779 | CID000193886 | CID000439245 |
| CID000000618 | CID003037582 | CID000007027 | CID003035456 | CID003246006 |
| CID000105021 | CID000439373 | CID023724466 | CID017756769 | CID000439255 |
| CID000005780 | CID005483640 | CID011006912 | CID017756767 | CID000439264 |
| CID000447152 | CID000191190 | CID000449043 | CID044229075 | CID000439273 |
| CID000017106 | CID006857365 | CID000439536 | CID024798720 | CID000165130 |
| CID000439394 | CID000001122 | CID000439544 | CID025203873 | CID000000604 |
| CID000152306 | CID005460407 | CID000439572 | CID046174047 | CID000439315 |
| CID000439446 | CID000439583 | CID023724469 | CID024755535 | CID000439343 |
| CID022833608 | CID000439695 | CID000439709 | CID024755534 | CID000151104 |
| CID000439507 | CID000092283 | CID005462244 | CID056927739 | CID000439399 |
| CID000439545 | CID000440667 | CID000440001 | CID054588960 | CID000439508 |
| CID006857362 | CID010130220 | CID014427002 | CID045281255 | CID000094154 |
| CID005459988 | CID023724606 | CID024892738 | CID000000868 | CID000439692 |
| CID005460171 | CID023724607 | CID023724475 | CID000439294 | CID000439694 |
| CID000065369 | CID000005958 | CID011426583 | CID000107737 | CID000439723 |
| CID000439912 | CID000439178 | CID000193002 | CID000000890 | CID023615403 |
| CID000193537 | CID000439186 | CID000440364 | CID000439444 | CID005460049 |
| CID006857359 | CID000439193 | CID016069659 | CID000439455 | CID000440303 |
| CID000440940 | CID046173703 | CID000188960 | CID000439456 | CID000440390 |
| CID000443242 | CID000016500 | CID000440961 | CID000107758 | CID000439432 |
| CID023724458 | CID000439244 | CID000440962 | CID000439468 | CID006971042 |
| CID000439160 | CID000122250 | CID000443243 | CID000440043 | CID000644110 |
| CID000005988 | CID000122336 | CID000439350 | CID000440194 | CID000440470 |
| CID000006036 | CID046173710 | CID000439459 | CID000128419 | CID000439163 |
| CID000000892 | CID000007427 | CID000006318 | CID000440211 | CID000018396 |
| CID000062223 | CID000082400 | CID054675756 | CID024771766 | CID000018950 |
| CID000087916 | CID000439555 | CID005280523 | CID000121969 | CID000439192 |

|                 |                 |                 |                 |                 |
|-----------------|-----------------|-----------------|-----------------|-----------------|
| CID000439242    | CID000439762    | CID000000254    | CID000121920    | CID000065127    |
| CID000439312    | CID000439874    | CID000000371    | CID000440388    | CID010918995    |
| CID000128869    | CID000440376    | CID000440018    | CID011706915    | CID000016323    |
| CID000439357    | CID000440773    | CID005280595    | CID000441201    | CID000007095    |
| CID000035717    | CID000440946    | CID000000569    | CID000441202    | CID000015625    |
| CID011727586    | CID000644101    | CID000003035    | CID000443266    | CID000000568    |
| CID000439531    | CID000167489    | CID000003036    | CID012308755    | CID000009216    |
| CID000011850    | CID000445675    | CID000440867    | CID000000283    | CID000006854    |
| CID000024154    | CID000448209    | CID000039929    | CID000644066    | CID000036187    |
| CID000439781    | CID000439174    | CID000042128    | CID000000289    | CID000063090    |
| CID000097165    | CID023724459    | CID000051130    | CID000000227    | CID000038439    |
| CID000440098    | CID023724461    | CID000038199    | CID000000242    | CID000038251    |
| CID000440117    | CID000439197    | CID000051043    | CID000000186    | CID000042540    |
| CID000440654    | CID000439213    | CID000036231    | CID000061503    | CID000029575    |
| CID016048618    | CID000440997    | CID000036188    | CID000092153    | CID000033032    |
| CID000440658    | CID000440996    | CID000053036    | CID000000880    | CID000000784    |
| CID000439620    | CID000439281    | CID000035823    | CID005280361    | CID000000750    |
| CID000439659    | CID003086191    | CID000047650    | CID000000338    | CID000000760    |
| CID000168934    | CID000000058    | CID000038019    | CID000000261    | CID000005961    |
| CID000439945    | CID000000887    | CID000050891    | CID000447765    | CID000005951    |
| CID000000524    | CID000001032    | CID000040479    | CID011966119    | CID000092753    |
| CID011966146    | CID000000096    | CID000018636    | CID009543049    | CID000122283    |
| CID000440064    | CID000000180    | CID000000977    | CID000000266    | CID000000757    |
| CID011966145    | CID000000527    | CID000000280    | CID000000043    | CID000000964    |
| CID071448895    | CID000001030    | CID000000222    | CID000225936    | CID000000971    |
| CID011966166    | CID000010110    | CID000439681    | CID011966206    | CID011966123    |
| CID049852422    | CID003081970    | CID003080625    | CID000000263    | CID000201434    |
| CID071448969    | CID009543026    | CID005459784    | CID011966192    | CID011966111    |
| CID000000239    | CID000068152    | CID000008299    | CID000000811    | CID003082032    |
| CID000445127    | CID000003776    | CID011966171    | CID011966125    | CID005497143    |
| CID000092824    | CID000000487    | CID000001031    | CID000643798    | CID011966122    |
| CID000000650    | CID000000119    | CID000440863    | CID000444212    | CID000119400    |
| CID000439314    | CID000123658    | CID025137843    | CID000439766    | CID054678503    |
| CID000010413    | CID000449534    | CID005462303    | CID000441696    | CID000000529    |
| CID000092135    | CID000000174    | CID000006584    | CID000444266    | CID000000599    |
| CID009543037    | CID000638129    | CID000001112    | CID000000264    |                 |
| ENSP00000260386 | ENSP00000303246 | ENSP00000288078 | ENSP00000263035 | ENSP00000209668 |
| ENSP00000272117 | ENSP00000217455 | ENSP00000309092 | ENSP00000222673 | ENSP00000378359 |
| ENSP00000263370 | ENSP00000380514 | ENSP00000179259 | ENSP00000264932 | ENSP00000296412 |
| ENSP00000267615 | ENSP00000238618 | ENSP00000370194 | ENSP00000364649 | ENSP00000312606 |
| ENSP00000262039 | ENSP00000378161 | ENSP00000216259 | ENSP00000335304 | ENSP00000280706 |
| ENSP00000363046 | ENSP00000372112 | ENSP00000268261 | ENSP00000342056 | ENSP00000302393 |
| ENSP00000365757 | ENSP00000362463 | ENSP00000369055 | ENSP00000253792 | ENSP00000229319 |
| ENSP00000347032 | ENSP00000307900 | ENSP00000225614 | ENSP00000355518 | ENSP00000280704 |
| ENSP00000264380 | ENSP00000318868 | ENSP00000368119 | ENSP00000309477 | ENSP00000222826 |
| ENSP00000263967 | ENSP00000333667 | ENSP00000264382 | ENSP00000216254 | ENSP00000366927 |
| ENSP00000289153 | ENSP00000389175 | ENSP00000326227 | ENSP00000377446 | ENSP00000345774 |
| ENSP00000366563 | ENSP00000244217 | ENSP00000305692 | ENSP00000366620 | ENSP00000255084 |

|                 |                 |                 |                 |                 |
|-----------------|-----------------|-----------------|-----------------|-----------------|
| ENSP00000352121 | ENSP00000274813 | ENSP00000218516 | ENSP00000270776 | ENSP00000387123 |
| ENSP00000265970 | ENSP00000365462 | ENSP00000306920 | ENSP00000377192 | ENSP00000346827 |
| ENSP00000356155 | ENSP00000359680 | ENSP00000216075 | ENSP00000358931 | ENSP00000261733 |
| ENSP00000287996 | ENSP00000241052 | ENSP00000358727 | ENSP00000280605 | ENSP00000225740 |
| ENSP00000359665 | ENSP00000368066 | ENSP00000345023 | ENSP00000321259 | ENSP00000295266 |
| ENSP00000264864 | ENSP00000316339 | ENSP00000370718 | ENSP00000306817 | ENSP00000307241 |
| ENSP00000357883 | ENSP00000293217 | ENSP00000350265 | ENSP00000361512 | ENSP00000205402 |
| ENSP00000265382 | ENSP00000348775 | ENSP00000369456 | ENSP00000381504 | ENSP00000280346 |
| ENSP00000335333 | ENSP00000242592 | ENSP00000258662 | ENSP00000416583 | ENSP00000346643 |
| ENSP00000373399 | ENSP00000231887 | ENSP00000216962 | ENSP00000283646 | ENSP00000290573 |
| ENSP00000219789 | ENSP00000370023 | ENSP00000216392 | ENSP00000303356 | ENSP00000292432 |
| ENSP00000362115 | ENSP00000357535 | ENSP00000164139 | ENSP00000267814 | ENSP00000223366 |
| ENSP00000360777 | ENSP00000268251 | ENSP00000317904 | ENSP00000221403 | ENSP00000269848 |
| ENSP00000360154 | ENSP00000269980 | ENSP00000261195 | ENSP00000285930 | ENSP00000370517 |
| ENSP00000352575 | ENSP00000318351 | ENSP00000410833 | ENSP00000319501 | ENSP00000312250 |
| ENSP00000347792 | ENSP00000359151 | ENSP00000298198 | ENSP00000298248 | ENSP00000320171 |
| ENSP00000357583 | ENSP00000352706 | ENSP00000330484 | ENSP00000343838 | ENSP00000339933 |
| ENSP00000384534 | ENSP00000262430 | ENSP00000359096 | ENSP00000304845 | ENSP00000362413 |
| ENSP00000359423 | ENSP00000289416 | ENSP00000359100 | ENSP00000418532 | ENSP00000305995 |
| ENSP00000359417 | ENSP00000296424 | ENSP00000264029 | ENSP00000362508 | ENSP00000364475 |
| ENSP00000345752 | ENSP00000168216 | ENSP00000420449 | ENSP00000362513 | ENSP00000364486 |
| ENSP00000384651 | ENSP00000322706 | ENSP00000354347 | ENSP00000303174 | ENSP00000361064 |
| ENSP00000371221 | ENSP00000358414 | ENSP00000253778 | ENSP00000362525 | ENSP00000364512 |
| ENSP00000180173 | ENSP00000196371 | ENSP00000268097 | ENSP00000362549 | ENSP00000269097 |
| ENSP00000074304 | ENSP00000361914 | ENSP00000261416 | ENSP00000346768 | ENSP00000253801 |
| ENSP00000262992 | ENSP00000381654 | ENSP00000337854 | ENSP00000251566 | ENSP00000319814 |
| ENSP00000361021 | ENSP00000363614 | ENSP00000356218 | ENSP00000305221 | ENSP00000216780 |
| ENSP00000298229 | ENSP00000314649 | ENSP00000299498 | ENSP00000304811 | ENSP00000226253 |
| ENSP00000337972 | ENSP00000350928 | ENSP00000358695 | ENSP00000274278 | ENSP00000345555 |
| ENSP00000338185 | ENSP00000259271 | ENSP00000216410 | ENSP00000282507 | ENSP00000234590 |
| ENSP00000260402 | ENSP00000324842 | ENSP00000210444 | ENSP00000265403 | ENSP00000324105 |
| ENSP00000279230 | ENSP00000267436 | ENSP00000379839 | ENSP00000341045 | ENSP00000229277 |
| ENSP00000388631 | ENSP00000219054 | ENSP00000356903 | ENSP00000320401 | ENSP00000272252 |
| ENSP00000244007 | ENSP00000327453 | ENSP00000229329 | ENSP00000334276 | ENSP00000359991 |
| ENSP00000345988 | ENSP00000300441 | ENSP00000302441 | ENSP00000207870 | ENSP00000297283 |
| ENSP00000367747 | ENSP00000301956 | ENSP00000341828 | ENSP00000385478 | ENSP00000412189 |
| ENSP00000266505 | ENSP00000382349 | ENSP00000311876 | ENSP00000338703 | ENSP00000342032 |
| ENSP00000356015 | ENSP00000327916 | ENSP00000295448 | ENSP00000302728 | ENSP00000371393 |
| ENSP00000265838 | ENSP00000340296 | ENSP00000387019 | ENSP00000369442 | ENSP00000316924 |
| ENSP00000285093 | ENSP00000366682 | ENSP00000377303 | ENSP00000364145 | ENSP00000327070 |
| ENSP00000321070 | ENSP00000364883 | ENSP00000262644 | ENSP00000356047 | ENSP00000299518 |
| ENSP00000358719 | ENSP00000331897 | ENSP00000408526 | ENSP00000369100 | ENSP00000260985 |
| ENSP00000313432 | ENSP00000300051 | ENSP00000269159 | ENSP00000232375 |                 |

## 2. Energy metabolism

|              |              |              |              |              |
|--------------|--------------|--------------|--------------|--------------|
| CID000000961 | CID000000674 | CID000439237 | CID000006329 | CID000000311 |
| CID000005957 | CID000001146 | CID049859699 | CID000000186 | CID000000868 |
| CID000005892 | CID000160226 | CID011966111 | CID000439190 | CID000001112 |
| CID000439153 | CID000439278 | CID005497143 | CID000000281 | CID000122347 |

|                 |                 |                 |                 |                 |
|-----------------|-----------------|-----------------|-----------------|-----------------|
| CID000000977    | CID021122601    | CID009543026    | CID000439194    | CID000000767    |
| CID000006022    | CID000123996    | CID000010413    | CID000000071    | CID000001198    |
| CID000001003    | CID000068841    | CID000068152    | CID000172312    | CID000092153    |
| CID000001023    | CID000189122    | CID009543037    | CID000005610    | CID000643757    |
| CID000001110    | CID000439377    | CID000449534    | CID000000491    | CID009825434    |
| CID000643976    | CID000448348    | CID011966171    | CID000026259    | CID000439175    |
| CID000000783    | CID000001145    | CID071448895    | CID000023736    | CID000222656    |
| CID000444972    | CID005462234    | CID011966166    | CID000000563    | CID000000964    |
| CID005280344    | CID005462235    | CID011966192    | CID000006213    | CID000000670    |
| CID005280346    | CID000000297    | CID071448968    | CID000000679    | CID000439183    |
| CID000000983    | CID000000105    | CID000000222    | CID000006395    | CID000439184    |
| CID000005884    | CID000000598    | CID000033032    | CID000123658    | CID000010238    |
| CID000005885    | CID000000893    | CID000005961    | CID000439645    | CID000001123    |
| CID000023930    | CID011966145    | CID000024529    | CID000165007    | CID000001084    |
| CID010219885    | CID000440314    | CID000000278    | CID000000051    | CID000000878    |
| CID024892729    | CID053297335    | CID000000787    | CID000644066    | CID000001068    |
| CID000000280    | CID005460331    | CID000000943    | CID000092133    | CID000099478    |
| CID000001060    | CID000440717    | CID000000713    | CID000092753    | CID000439406    |
| CID000444493    | CID000193886    | CID000145068    | CID000006057    | CID000122357    |
| CID000000175    | CID000443250    | CID000000947    | CID000439160    | CID000164735    |
| CID000000970    | CID000447123    | CID000000948    | CID000091443    | CID000000177    |
| CID000000750    | CID000086962    | CID000000540    | CID000000668    | CID000000402    |
| CID000000760    | CID000146903    | CID000000276    | CID000439168    | CID000001099    |
| CID000000283    | CID000169732    | CID000009321    | CID000000887    | CID000005862    |
| CID000005951    | CID045266867    | CID000010214    | CID000005960    | CID000091552    |
| CID000000712    | CID045480622    | CID000159296    | CID000439167    | CID000439191    |
| CID000001005    | CID000005950    | CID000001117    |                 |                 |
| ENSP00000264932 | ENSP00000364486 | ENSP00000222286 | ENSP00000168216 | ENSP00000285379 |
| ENSP00000364649 | ENSP00000226253 | ENSP00000362413 | ENSP00000356015 | ENSP00000285381 |
| ENSP00000356972 | ENSP00000345555 | ENSP00000305995 | ENSP00000265838 | ENSP00000300900 |
| ENSP00000263774 | ENSP00000234590 | ENSP00000358931 | ENSP00000285093 | ENSP00000314099 |
| ENSP00000233627 | ENSP00000324105 | ENSP00000280605 | ENSP00000370023 | ENSP00000366662 |
| ENSP00000315774 | ENSP00000229277 | ENSP00000283646 | ENSP00000357535 | ENSP00000345659 |
| ENSP00000322450 | ENSP00000359991 | ENSP00000303077 | ENSP00000244217 | ENSP00000367608 |
| ENSP00000327268 | ENSP00000297283 | ENSP00000359539 | ENSP00000274813 | ENSP00000265174 |
| ENSP00000354499 | ENSP00000412189 | ENSP00000245206 | ENSP00000365462 | ENSP00000406157 |
| ENSP00000343885 | ENSP00000342032 | ENSP00000378408 | ENSP00000365775 | ENSP00000292147 |
| ENSP00000362329 | ENSP00000316924 | ENSP00000345282 | ENSP00000379108 | ENSP00000266971 |
| ENSP00000357835 | ENSP00000327070 | ENSP00000358719 | ENSP00000377617 | ENSP00000357861 |
| ENSP00000271620 | ENSP00000318868 | ENSP00000260985 | ENSP00000356290 | ENSP00000249042 |
| ENSP00000354687 | ENSP00000333667 | ENSP00000331897 | ENSP00000277865 | ENSP00000318852 |
| ENSP00000355046 | ENSP00000365773 | ENSP00000253792 | ENSP00000327589 | ENSP00000262644 |
| ENSP00000355206 | ENSP00000215904 | ENSP00000355518 | ENSP00000307900 | ENSP00000306397 |
| ENSP00000354728 | ENSP00000275605 | ENSP00000309477 | ENSP00000402608 | ENSP00000262030 |
| ENSP00000354961 | ENSP00000296412 | ENSP00000216254 | ENSP00000178638 | ENSP00000273398 |
| ENSP00000354813 | ENSP00000356729 | ENSP00000377446 | ENSP00000318912 | ENSP00000262623 |
| ENSP00000354665 | ENSP00000367992 | ENSP00000231887 | ENSP00000358107 | ENSP00000269848 |
| ENSP00000370517 | ENSP00000364475 |                 |                 |                 |

### 3. Lipid metabolism

|              |              |              |              |              |
|--------------|--------------|--------------|--------------|--------------|
| CID000444493 | CID006449797 | CID000164673 | CID000105074 | CID005280914 |
| CID000644066 | CID000101770 | CID000127601 | CID000065517 | CID005280915 |
| CID000644109 | CID000440371 | CID005283827 | CID000008629 | CID005282263 |
| CID000000985 | CID023724484 | CID005283886 | CID000439162 | CID005311211 |
| CID000000867 | CID000440558 | CID005283882 | CID000065533 | CID005283159 |
| CID000445639 | CID000440559 | CID005283853 | CID000000668 | CID005283157 |
| CID000005281 | CID000440560 | CID005283851 | CID000000753 | CID005283202 |
| CID000002969 | CID000092746 | CID000160636 | CID000000670 | CID005283203 |
| CID000003893 | CID000440670 | CID000006128 | CID000439183 | CID005283204 |
| CID000092753 | CID005280793 | CID000005994 | CID000439194 | CID005283205 |
| CID000000379 | CID005280794 | CID000005870 | CID000079014 | CID005283146 |
| CID000011005 | CID005280795 | CID000005879 | CID000439278 | CID005283147 |
| CID000445638 | CID005281327 | CID000006013 | CID000075049 | CID005283154 |
| CID000122283 | CID005281326 | CID000222865 | CID000010442 | CID005283155 |
| CID000165436 | CID000443212 | CID000005754 | CID016048618 | CID009548884 |
| CID000445344 | CID000443237 | CID000222786 | CID000443243 | CID005283168 |
| CID011966124 | CID000193524 | CID000005757 | CID000000177 | CID011954042 |
| CID011966110 | CID023724571 | CID000011222 | CID000000305 | CID011954043 |
| CID011966179 | CID010894570 | CID000006238 | CID000000700 | CID005283162 |
| CID000169621 | CID053297366 | CID000005881 | CID000013804 | CID005283211 |
| CID011966177 | CID023724575 | CID000005839 | CID000001015 | CID005283208 |
| CID011966197 | CID023724596 | CID000008955 | CID000439249 | CID005283209 |
| CID011966173 | CID023724597 | CID000005753 | CID000123727 | CID005283210 |
| CID011966169 | CID023724604 | CID000000129 | CID000001014 | CID009548885 |
| CID011966158 | CID000000750 | CID000068570 | CID000439276 | CID011954059 |
| CID011966155 | CID000001123 | CID003001028 | CID000439285 | CID009548886 |
| CID011966216 | CID000221493 | CID000006166 | CID000439436 | CID005283156 |
| CID011966162 | CID000439479 | CID000092810 | CID000444183 | CID009548880 |
| CID011966160 | CID071448889 | CID000440114 | CID000000187 | CID005283163 |
| CID003082152 | CID000010140 | CID000440143 | CID000007618 | CID005280450 |
| CID000449118 | CID000010133 | CID000010635 | CID000008113 | CID005280581 |
| CID011966204 | CID000107722 | CID000008956 | CID000151438 | CID005280644 |
| CID025271599 | CID000440384 | CID000010634 | CID070698354 | CID005280720 |
| CID011966172 | CID000440460 | CID000005880 | CID000444899 | CID005280933 |
| CID000164800 | CID053297338 | CID000440368 | CID000445049 | CID005460412 |
| CID024883423 | CID011966205 | CID000012594 | CID005280360 | CID006443013 |
| CID011966175 | CID003082089 | CID000440573 | CID005280363 | CID006446027 |
| CID000087642 | CID005460041 | CID000102030 | CID000448457 | CID009839084 |
| CID000092153 | CID000193321 | CID000005756 | CID005280383 | CID005312830 |
| CID000000743 | CID071448894 | CID000094141 | CID005280427 | CID005281128 |
| CID000000984 | CID046224536 | CID000223997 | CID005280492 | CID009548877 |
| CID003081383 | CID046224539 | CID000252379 | CID005280493 | CID010236635 |
| CID000002682 | CID005284270 | CID046173741 | CID005280497 | CID025755601 |
| CID005497143 | CID003080603 | CID000011302 | CID005280701 | CID005280411 |
| CID009543037 | CID005284271 | CID000065542 | CID005280724 | CID005280729 |
| CID000167759 | CID000160520 | CID000440623 | CID005280733 | CID005497123 |
| CID000000757 | CID000123743 | CID000440624 | CID005283170 | CID005280934 |

|                 |                 |                 |                 |                 |
|-----------------|-----------------|-----------------|-----------------|-----------------|
| CID011966146    | CID046224544    | CID000440625    | CID005280745    | CID005281166    |
| CID011966194    | CID000387316    | CID000247304    | CID005280778    | CID005281167    |
| CID011966165    | CID000012544    | CID000066414    | CID005280876    | CID005281929    |
| CID000000096    | CID025195379    | CID000065554    | CID005280877    | CID005312508    |
| CID000000180    | CID000440985    | CID000164838    | CID005280878    | CID005283028    |
| CID000445127    | CID000121948    | CID000005864    | CID005280879    | CID005312889    |
| CID000092135    | CID011954196    | CID000440694    | CID005280880    | CID000643941    |
| CID011966129    | CID000065094    | CID000092745    | CID005280881    | CID016061072    |
| CID000008215    | CID011954197    | CID000160499    | CID005280883    | CID007251182    |
| CID000441449    | CID000099470    | CID000246873    | CID005280884    | CID006441679    |
| CID000010466    | CID015942889    | CID000219833    | CID005280885    | CID006450029    |
| CID000015868    | CID044263831    | CID000150891    | CID005280886    | CID000075704    |
| CID000010459    | CID000165511    | CID000192735    | CID005280888    | CID006439873    |
| CID005282922    | CID003081084    | CID000440707    | CID005280889    | CID006430107    |
| CID000244872    | CID000193396    | CID000440708    | CID005280890    | CID016061034    |
| CID000167775    | CID003081085    | CID000440709    | CID005280892    | CID023724728    |
| CID000005997    | CID003081958    | CID000101788    | CID005280893    | CID005363388    |
| CID000445713    | CID015942888    | CID021145112    | CID000446284    | CID000005951    |
| CID000638072    | CID024755558    | CID000121935    | CID000445580    | CID005280335    |
| CID005459811    | CID050986116    | CID006453841    | CID005281116    | CID000091486    |
| CID000439423    | CID000009903    | CID000167685    | CID000011197    | CID000644260    |
| CID000065728    | CID000222528    | CID000066416    | CID005281120    | CID005280458    |
| CID005283731    | CID000031401    | CID000115255    | CID025164091    | CID000439853    |
| CID005280453    | CID005283821    | CID000108192    | CID056928001    | CID005280613    |
| CID000444679    | CID005283820    | CID000114833    | CID056928013    | CID005283560    |
| CID000246983    | CID000122340    | CID000092786    | CID056927904    | CID000122121    |
| CID000222284    | CID005283831    | CID000101771    | CID056928012    | CID000094140    |
| CID000173183    | CID005283852    | CID009967418    | CID056928006    | CID005497111    |
| CID000439577    | CID000092805    | CID006451493    | CID056927909    | CID003081439    |
| CID000092110    | CID005283845    | CID003080558    | CID070678705    | CID005497112    |
| CID000065252    | CID005283892    | CID000164674    | CID056927910    | CID005497113    |
| CID000101690    | CID000164853    | CID000065076    | CID000010467    | CID011966132    |
| CID011966190    | CID056928014    | CID005312529    | CID005282768    | CID000168166    |
| CID071448924    | CID056927911    | CID006439848    | CID005497181    | CID003082227    |
| ENSP00000263702 | ENSP00000238651 | ENSP00000325822 | ENSP00000232892 | ENSP00000363400 |
| ENSP00000290429 | ENSP00000323071 | ENSP00000268053 | ENSP00000299022 | ENSP00000274793 |
| ENSP00000280701 | ENSP00000367086 | ENSP00000264228 | ENSP00000261292 | ENSP00000259486 |
| ENSP00000367462 | ENSP00000357804 | ENSP00000274192 | ENSP00000358223 | ENSP00000284116 |
| ENSP00000258873 | ENSP00000357807 | ENSP00000354511 | ENSP00000358232 | ENSP00000321038 |
| ENSP00000281455 | ENSP00000250974 | ENSP00000333310 | ENSP00000337701 | ENSP00000407375 |
| ENSP00000350012 | ENSP00000366240 | ENSP00000201586 | ENSP00000370430 | ENSP00000374265 |
| ENSP00000339787 | ENSP00000258884 | ENSP00000226444 | ENSP00000256720 | ENSP00000373477 |
| ENSP00000348429 | ENSP00000381654 | ENSP00000312606 | ENSP00000261596 | ENSP00000392398 |
| ENSP00000267842 | ENSP00000363614 | ENSP00000285930 | ENSP00000362354 | ENSP00000354581 |
| ENSP00000209668 | ENSP00000355308 | ENSP00000338703 | ENSP00000264775 | ENSP00000354677 |
| ENSP00000378359 | ENSP00000373153 | ENSP00000218516 | ENSP00000329697 | ENSP00000290349 |
| ENSP00000296412 | ENSP00000261875 | ENSP00000389175 | ENSP00000381302 | ENSP00000290354 |
| ENSP00000366927 | ENSP00000357535 | ENSP00000265276 | ENSP00000392553 | ENSP00000326219 |

|                 |                 |                 |                 |                 |
|-----------------|-----------------|-----------------|-----------------|-----------------|
| ENSP00000345774 | ENSP00000301729 | ENSP00000352547 | ENSP00000251473 | ENSP00000251535 |
| ENSP00000255084 | ENSP00000346874 | ENSP00000264409 | ENSP00000352962 | ENSP00000293761 |
| ENSP00000387123 | ENSP00000182377 | ENSP00000380184 | ENSP00000359204 | ENSP00000369530 |
| ENSP00000346827 | ENSP00000228027 | ENSP00000406674 | ENSP00000292823 | ENSP00000363512 |
| ENSP00000261733 | ENSP00000223114 | ENSP00000198801 | ENSP00000368439 | ENSP00000354612 |
| ENSP00000370023 | ENSP00000363645 | ENSP00000262134 | ENSP00000260585 | ENSP00000356438 |
| ENSP00000296424 | ENSP00000359297 | ENSP00000310551 | ENSP00000229266 | ENSP00000221730 |
| ENSP00000278353 | ENSP00000254521 | ENSP00000302177 | ENSP00000219789 | ENSP00000228740 |
| ENSP00000231887 | ENSP00000358421 | ENSP00000337463 | ENSP00000282541 | ENSP00000248923 |
| ENSP00000168216 | ENSP00000265896 | ENSP00000360761 | ENSP00000301149 | ENSP00000381340 |
| ENSP00000369050 | ENSP00000216862 | ENSP00000291572 | ENSP00000308610 | ENSP00000292596 |
| ENSP00000342007 | ENSP00000228606 | ENSP00000314036 | ENSP00000255389 | ENSP00000356859 |
| ENSP00000332679 | ENSP00000261507 | ENSP00000285518 | ENSP00000317300 | ENSP00000295256 |
| ENSP00000360317 | ENSP00000264027 | ENSP00000216180 | ENSP00000261407 | ENSP00000360687 |
| ENSP00000260682 | ENSP00000347717 | ENSP00000328405 | ENSP00000283415 | ENSP00000345341 |
| ENSP00000285979 | ENSP00000279263 | ENSP00000382260 | ENSP00000355607 | ENSP00000342385 |
| ENSP00000360372 | ENSP00000360316 | ENSP00000264057 | ENSP00000264005 | ENSP00000262033 |
| ENSP00000252945 | ENSP00000356591 | ENSP00000284061 | ENSP00000337103 | ENSP00000244043 |
| ENSP00000333534 | ENSP00000301466 | ENSP00000265022 | ENSP00000265689 | ENSP00000308032 |
| ENSP00000333212 | ENSP00000220584 | ENSP00000337572 | ENSP00000384400 | ENSP00000278840 |
| ENSP00000222382 | ENSP00000337354 | ENSP00000288490 | ENSP00000266517 | ENSP00000306920 |
| ENSP00000222982 | ENSP00000348762 | ENSP00000273814 | ENSP00000356170 | ENSP00000364782 |
| ENSP00000337450 | ENSP00000297679 | ENSP00000351706 | ENSP00000295887 | ENSP00000233840 |
| ENSP00000311095 | ENSP00000301645 | ENSP00000418001 | ENSP00000419879 | ENSP00000294064 |
| ENSP00000360991 | ENSP00000275016 | ENSP00000368226 | ENSP00000308258 | ENSP00000367343 |
| ENSP00000221700 | ENSP00000310721 | ENSP00000365725 | ENSP00000368140 | ENSP00000314508 |
| ENSP00000221307 | ENSP00000258415 | ENSP00000268129 | ENSP00000262764 | ENSP00000307126 |
| ENSP00000248041 | ENSP00000318867 | ENSP00000295962 | ENSP00000289119 | ENSP00000316476 |
| ENSP00000321821 | ENSP00000360918 | ENSP00000379282 | ENSP00000264735 | ENSP00000271688 |
| ENSP00000360968 | ENSP00000307697 | ENSP00000342793 | ENSP00000320337 | ENSP00000284382 |
| ENSP00000334246 | ENSP00000242375 | ENSP00000263088 | ENSP00000255688 | ENSP00000251363 |
| ENSP00000360958 | ENSP00000360569 | ENSP00000348901 | ENSP00000301790 | ENSP00000325485 |
| ENSP00000265322 | ENSP00000263093 | ENSP00000376372 | ENSP00000342026 | ENSP00000262554 |
| ENSP00000215567 | ENSP00000343838 | ENSP00000369099 | ENSP00000312286 | ENSP00000216484 |
| ENSP00000293217 | ENSP00000304845 | ENSP00000266095 | ENSP00000356436 | ENSP00000381968 |
| ENSP00000348775 | ENSP00000418532 | ENSP00000296486 | ENSP00000396045 | ENSP00000360776 |
| ENSP00000242592 | ENSP00000362508 | ENSP00000264167 | ENSP00000290472 | ENSP00000306459 |
| ENSP00000222214 | ENSP00000362513 | ENSP00000343234 | ENSP00000215885 | ENSP00000363397 |
| ENSP00000409612 | ENSP00000303174 | ENSP00000262890 | ENSP00000364249 | ENSP00000216264 |
| ENSP00000233710 | ENSP00000362525 | ENSP00000356015 | ENSP00000364252 | ENSP00000313681 |
| ENSP00000285093 | ENSP00000362549 | ENSP00000265838 | ENSP00000364246 | ENSP00000245222 |
| ENSP00000325136 | ENSP00000346768 | ENSP00000322706 | ENSP00000364257 | ENSP00000332656 |
| ENSP00000333664 | ENSP00000251566 | ENSP00000358414 | ENSP00000364243 | ENSP00000219334 |
| ENSP00000361536 | ENSP00000305221 | ENSP00000196371 | ENSP00000393847 | ENSP00000258052 |
| ENSP00000346693 | ENSP00000304811 | ENSP00000361914 | ENSP00000243501 | ENSP00000261304 |
| ENSP00000359022 | ENSP00000274278 | ENSP00000259407 | ENSP00000330442 | ENSP00000301452 |
| ENSP00000358831 | ENSP00000282507 | ENSP00000217455 | ENSP00000333142 | ENSP00000342609 |
| ENSP00000304736 | ENSP00000265403 | ENSP00000360366 | ENSP00000257694 | ENSP00000371152 |

|                 |                 |                 |                 |                 |
|-----------------|-----------------|-----------------|-----------------|-----------------|
| ENSP00000265641 | ENSP00000341045 | ENSP00000311224 | ENSP00000303211 | ENSP00000378897 |
| ENSP00000312189 | ENSP00000320401 | ENSP00000369927 | ENSP00000325958 | ENSP00000362298 |
| ENSP00000319343 | ENSP00000334276 | ENSP00000381206 | ENSP00000406909 | ENSP00000359380 |
| ENSP00000360541 | ENSP00000358424 | ENSP00000351035 | ENSP00000368305 | ENSP00000316329 |
| ENSP00000363794 | ENSP00000370254 | ENSP00000364412 | ENSP00000292427 | ENSP00000358903 |
| ENSP00000318631 | ENSP00000199936 |                 |                 |                 |

#### 4. Nucleotide metabolism

|                 |                 |                 |                 |                 |
|-----------------|-----------------|-----------------|-----------------|-----------------|
| CID000005957    | CID000439236    | CID000006176    | CID046173085    | CID000068152    |
| CID000006022    | CID000073323    | CID000006133    | CID046173135    | CID000160617    |
| CID000000280    | CID000439296    | CID000000239    | CID001751483    | CID000439424    |
| CID000000222    | CID000000456    | CID000006030    | CID000000203    | CID000443736    |
| CID000006083    | CID000024316    | CID000001174    | CID000013730    | CID000006031    |
| CID000008977    | CID000439450    | CID000006132    | CID000006076    | CID000008629    |
| CID000000750    | CID000021706    | CID000001135    | CID000439269    | CID000006131    |
| CID000006830    | CID000165186    | CID000005789    | CID000015047    | CID000066535    |
| CID000000760    | CID000439488    | CID000000868    | CID000000487    | CID000148196    |
| CID000010214    | CID000146302    | CID000013945    | CID000000111    | CID010290858    |
| CID000159296    | CID0000041211   | CID000000967    | CID000440189    | CID046173244    |
| CID000001117    | CID000000974    | CID000006029    | CID000065059    | CID000000504    |
| CID000005961    | CID000064959    | CID000439216    | CID000001175    | CID000091531    |
| CID000008583    | CID045479615    | CID000164628    | CID000001188    | CID000165381    |
| CID000001176    | CID000439713    | CID000009700    | CID000006802    | CID000250388    |
| CID000006831    | CID000439714    | CID000065063    | CID000065103    | CID000160666    |
| CID000439167    | CID000000908    | CID000000597    | CID000000767    | CID000000484    |
| CID000007339    | CID000439905    | CID000000867    | CID000006021    | CID000065058    |
| CID000008582    | CID000161500    | CID000000649    | CID000445794    | CID000000155    |
| CID000015993    | CID000014003    | CID000093072    | CID000187790    | CID000000117    |
| CID000006804    | CID000447145    | CID000065091    | CID000012599    | CID000440867    |
| CID000000190    | CID000160913    | CID000064968    | CID000439220    | CID000008339    |
| CID000000278    | CID000009679    | CID000065070    | CID005287787    | CID000166760    |
| CID000188966    | CID000130805    | CID000006175    | CID000145729    | CID000165388    |
| CID000000971    | CID000038166    | CID000013712    | CID000101543    | CID000150855    |
| CID000060961    | CID005462266    | CID005460448    | CID000000276    | CID000006211    |
| CID000010238    | CID000065110    | CID000000764    | CID000000790    | CID000013711    |
| ENSP00000320171 | ENSP00000362249 | ENSP00000347046 | ENSP00000307674 | ENSP00000264424 |
| ENSP00000339933 | ENSP00000346921 | ENSP00000255266 | ENSP00000351520 | ENSP00000261170 |
| ENSP00000371393 | ENSP00000346577 | ENSP00000420295 | ENSP00000335246 | ENSP00000254854 |
| ENSP00000361512 | ENSP00000267584 | ENSP00000360502 | ENSP00000365840 | ENSP00000218006 |
| ENSP00000381504 | ENSP00000298545 | ENSP00000291539 | ENSP00000370718 | ENSP00000333019 |
| ENSP00000345096 | ENSP00000256722 | ENSP00000332116 | ENSP00000350265 | ENSP00000355493 |
| ENSP00000321584 | ENSP00000219302 | ENSP00000310661 | ENSP00000369456 | ENSP00000419851 |
| ENSP00000300738 | ENSP00000356785 | ENSP00000311453 | ENSP00000258662 | ENSP00000313490 |
| ENSP00000251810 | ENSP00000013034 | ENSP00000264917 | ENSP00000382595 | ENSP00000359211 |
| ENSP00000259727 | ENSP00000376886 | ENSP00000330721 | ENSP00000333490 | ENSP00000219240 |
| ENSP00000392859 | ENSP00000219479 | ENSP00000252505 | ENSP00000297323 | ENSP00000315644 |
| ENSP00000371236 | ENSP00000323036 | ENSP00000262607 | ENSP00000342952 | ENSP00000264705 |
| ENSP00000236959 | ENSP00000235628 | ENSP00000369099 | ENSP00000260600 | ENSP00000232607 |
| ENSP00000354532 | ENSP00000352904 | ENSP00000419628 | ENSP00000312126 | ENSP00000330032 |



|                 |                 |                 |                 |                 |
|-----------------|-----------------|-----------------|-----------------|-----------------|
| ENSP00000264220 | ENSP00000339479 | ENSP00000303575 | ENSP00000419361 | ENSP00000252029 |
| ENSP00000298556 | ENSP00000257770 | ENSP00000355587 | ENSP00000311405 | ENSP00000301634 |
| ENSP00000264093 | ENSP00000243052 | ENSP00000318066 | ENSP00000254235 | ENSP00000361289 |
| ENSP00000265174 | ENSP00000334910 | ENSP00000339016 | ENSP00000286355 | ENSP00000356853 |
| ENSP00000406157 | ENSP00000351957 | ENSP00000287394 | ENSP00000294016 | ENSP00000346155 |
| ENSP00000371230 | ENSP00000282096 | ENSP00000294053 | ENSP00000356825 | ENSP00000304802 |
| ENSP00000361699 | ENSP00000286063 | ENSP00000215862 | ENSP00000357669 | ENSP00000324343 |
| ENSP00000352222 | ENSP00000322524 | ENSP00000301825 | ENSP00000341083 | ENSP00000276651 |
| ENSP00000360561 | ENSP00000296518 | ENSP00000349576 |                 |                 |

## 5. Amino acid metabolism

|              |              |              |              |              |
|--------------|--------------|--------------|--------------|--------------|
| CID000000280 | CID000000880 | CID009833951 | CID020802017 | CID000439402 |
| CID000000222 | CID000000249 | CID000115015 | CID000006057 | CID000005810 |
| CID000033032 | CID000000763 | CID000006325 | CID000000996 | CID000193305 |
| CID000000051 | CID000439278 | CID000000563 | CID000006047 | CID000108012 |
| CID000005960 | CID000000247 | CID000001119 | CID000005610 | CID000107541 |
| CID000006322 | CID000071077 | CID000443233 | CID000000785 | CID009548602 |
| CID000005961 | CID000000428 | CID000443250 | CID000000780 | CID000069217 |
| CID000006262 | CID000068841 | CID005462190 | CID000439260 | CID000000559 |
| CID000001176 | CID000000673 | CID000000561 | CID000003469 | CID000122356 |
| CID000444972 | CID000151187 | CID000161214 | CID000000127 | CID000018189 |
| CID000000278 | CID000000215 | CID000444493 | CID000005815 | CID000188984 |
| CID000009750 | CID000439258 | CID000001132 | CID000637542 | CID000193475 |
| CID000439232 | CID000152441 | CID000092133 | CID000439316 | CID000439968 |
| CID000070914 | CID000000105 | CID000092753 | CID005280393 | CID000005942 |
| CID000150833 | CID000134490 | CID000006106 | CID000009305 | CID000127370 |
| CID000192878 | CID000440033 | CID000000049 | CID005280398 | CID000440014 |
| CID000016950 | CID000099289 | CID000000096 | CID000000547 | CID000440046 |
| CID000440236 | CID000126041 | CID000006287 | CID000000979 | CID000000558 |
| CID000001060 | CID000441021 | CID000000070 | CID000444266 | CID000440237 |
| CID000000970 | CID012011795 | CID000092153 | CID005459802 | CID011966267 |
| CID000005950 | CID000034755 | CID000000296 | CID000005819 | CID005280691 |
| CID000001110 | CID000439155 | CID000445127 | CID005281792 | CID000440575 |
| CID000006267 | CID000124886 | CID000006306 | CID005280494 | CID000440847 |
| CID000000311 | CID000001117 | CID003036931 | CID000009727 | CID000440848 |
| CID000001112 | CID000006137 | CID000439286 | CID000005920 | CID000123895 |
| CID000000119 | CID000001099 | CID011966111 | CID000439744 | CID000440850 |
| CID000440997 | CID000091552 | CID005287787 | CID000000681 | CID000012473 |
| CID000083887 | CID000439176 | CID000449534 | CID000440113 | CID000092150 |
| CID000093072 | CID000000402 | CID000000487 | CID000119219 | CID000440854 |
| CID000000048 | CID000000878 | CID000165435 | CID000119405 | CID005281796 |
| CID000065065 | CID000067678 | CID009549326 | CID000440311 | CID023724544 |
| CID000439716 | CID000072886 | CID071448892 | CID005280709 | CID046174065 |
| CID000439905 | CID001549097 | CID000439434 | CID000091528 | CID044229222 |
| CID000447145 | CID000092851 | CID000193425 | CID000151725 | CID000007339 |
| CID000440162 | CID000000098 | CID006443760 | CID000114683 | CID000006274 |
| CID000071120 | CID000099478 | CID000165390 | CID000440728 | CID000000774 |
| CID000000750 | CID000439389 | CID011966220 | CID000085782 | CID000439233 |
| CID000000760 | CID000439406 | CID011966188 | CID000151276 | CID000736715 |

|              |              |              |              |               |
|--------------|--------------|--------------|--------------|---------------|
| CID000005951 | CID000439415 | CID011966163 | CID000001738 | CID000165271  |
| CID000006305 | CID000000473 | CID000440873 | CID000440729 | CID000088052  |
| CID000005862 | CID000000535 | CID005462303 | CID000001245 | CID000439376  |
| CID000091443 | CID000010010 | CID071448903 | CID000070949 | CID000064969  |
| CID000000058 | CID000165331 | CID000643798 | CID000001669 | CID000112071  |
| CID000000305 | CID000123991 | CID005280523 | CID000688084 | CID000000792  |
| CID000439175 | CID000080283 | CID000439766 | CID000688100 | CID000152657  |
| CID000000964 | CID000158980 | CID005462261 | CID000012122 | CID011988267  |
| CID000006288 | CID000439904 | CID000005962 | CID000010805 | CID000096215  |
| CID000439183 | CID000439750 | CID000000071 | CID005280801 | CID000000794  |
| CID000001088 | CID000440041 | CID000160556 | CID000161255 | CID000440000  |
| CID000439194 | CID011988266 | CID000439283 | CID000010393 | CID000000128  |
| CID000000586 | CID000174549 | CID000099290 | CID000159278 | CID000440431  |
| CID000000137 | CID000000110 | CID000092136 | CID000068313 | CID000065110  |
| CID000439235 | CID000440717 | CID000439459 | CID000348154 | CID000193735  |
| CID003037042 | CID000000242 | CID000194695 | CID014178745 | CID0000003614 |
| CID000440726 | CID000444539 | CID000440179 | CID017796835 | CID000150841  |
| CID000193545 | CID009543169 | CID000160603 | CID000006140 | CID000069602  |
| CID000075810 | CID000165620 | CID000440349 | CID000000177 | CID000000782  |
| CID000121396 | CID005280361 | CID005459812 | CID000000997 | CID000000793  |
| CID000164697 | CID000000998 | CID005460671 | CID005371769 | CID000068144  |
| CID000439430 | CID000000338 | CID051055215 | CID000351795 | CID000643327  |
| CID000439460 | CID000009294 | CID000122283 | CID000011811 | CID000101184  |
| CID000000273 | CID000000464 | CID000439227 | CID005280595 | CID000000107  |
| CID000092832 | CID000637540 | CID000000138 | CID000001066 | CID000011970  |
| CID000439939 | CID000011915 | CID024771808 | CID005280625 | CID000006054  |
| CID000439954 | CID009543152 | CID000000085 | CID005280673 | CID000000999  |
| CID000439963 | CID000071567 | CID000000743 | CID000074688 | CID000000091  |
| CID000440077 | CID000007680 | CID003081383 | CID000001826 | CID000637541  |
| CID000440120 | CID000007028 | CID000057449 | CID000164719 | CID005282146  |
| CID000128888 | CID000074839 | CID005497143 | CID000171161 | CID000011363  |
| CID000193187 | CID000000020 | CID009543037 | CID000001864 | CID046926111  |
| CID000001194 | CID000092258 | CID000000133 | CID000440741 | CID046926226  |
| CID011966128 | CID000001001 | CID000000134 | CID009548587 | CID000000227  |
| CID000123762 | CID000439319 | CID011966129 | CID000101399 | CID000161165  |
| CID000443849 | CID000439351 | CID000000523 | CID000050591 | CID000000803  |
| CID003032849 | CID000439394 | CID000000502 | CID000001833 | CID000001150  |
| CID000001045 | CID000439463 | CID000145068 | CID000018986 | CID000000798  |
| CID000145742 | CID000439774 | CID000000118 | CID000440752 | CID000000086  |
| CID000000199 | CID000121947 | CID000001103 | CID000076230 | CID000000800  |
| CID006440013 | CID000444150 | CID000008988 | CID000151066 | CID000439280  |
| CID000001102 | CID000160647 | CID000000588 | CID000656506 | CID000005202  |
| CID002724505 | CID000007420 | CID000000500 | CID000006088 | CID000000801  |
| CID000001028 | CID000005800 | CID000439375 | CID000006736 | CID000010685  |
| CID000122357 | CID000011321 | CID000000397 | CID000001018 | CID000000903  |
| CID000006508 | CID000005699 | CID000439788 | CID000001005 | CID000000472  |
| CID000172312 | CID000008742 | CID000021860 | CID000000072 | CID000000896  |
| CID000012039 | CID000003845 |              |              |               |

|                 |                 |                 |                 |                 |
|-----------------|-----------------|-----------------|-----------------|-----------------|
| ENSP00000327251 | ENSP00000342032 | ENSP00000347324 | ENSP00000356015 | ENSP00000373640 |
| ENSP00000297494 | ENSP00000313432 | ENSP00000255192 | ENSP00000265838 | ENSP00000263556 |
| ENSP00000277865 | ENSP00000319851 | ENSP00000355536 | ENSP00000322706 | ENSP00000166534 |
| ENSP00000327589 | ENSP00000387123 | ENSP00000366156 | ENSP00000358414 | ENSP00000332170 |
| ENSP00000293404 | ENSP00000253799 | ENSP00000385746 | ENSP00000196371 | ENSP00000360268 |
| ENSP00000303077 | ENSP00000312326 | ENSP00000303147 | ENSP00000361914 | ENSP00000354193 |
| ENSP00000359539 | ENSP00000228476 | ENSP00000322991 | ENSP00000381654 | ENSP00000328858 |
| ENSP00000245206 | ENSP00000340684 | ENSP00000273920 | ENSP00000363614 | ENSP00000342502 |
| ENSP00000378408 | ENSP00000367309 | ENSP00000315931 | ENSP00000370023 | ENSP00000307252 |
| ENSP00000345282 | ENSP00000370737 | ENSP00000217426 | ENSP00000357535 | ENSP00000349577 |
| ENSP00000317379 | ENSP00000360938 | ENSP00000357880 | ENSP00000265395 | ENSP00000368572 |
| ENSP00000310447 | ENSP00000255189 | ENSP00000302227 | ENSP00000363832 | ENSP00000269298 |
| ENSP00000357066 | ENSP00000403536 | ENSP00000260508 | ENSP00000269980 | ENSP00000299198 |
| ENSP00000261783 | ENSP00000361894 | ENSP0000040663  | ENSP00000318351 | ENSP00000221476 |
| ENSP00000307188 | ENSP00000274353 | ENSP00000366927 | ENSP00000359151 | ENSP00000254035 |
| ENSP00000307900 | ENSP00000318868 | ENSP00000345774 | ENSP00000352706 | ENSP00000300283 |
| ENSP00000402608 | ENSP00000333667 | ENSP00000255084 | ENSP00000364883 | ENSP00000226299 |
| ENSP00000253004 | ENSP00000273588 | ENSP00000346827 | ENSP00000244217 | ENSP00000325548 |
| ENSP00000264220 | ENSP00000379895 | ENSP00000261733 | ENSP00000274813 | ENSP00000351682 |
| ENSP00000333019 | ENSP00000309259 | ENSP00000231887 | ENSP00000324842 | ENSP00000216271 |
| ENSP00000355493 | ENSP00000365773 | ENSP00000168216 | ENSP00000365462 | ENSP00000364986 |
| ENSP00000264705 | ENSP00000389175 | ENSP00000242592 | ENSP00000265594 | ENSP00000234111 |
| ENSP00000314649 | ENSP00000215904 | ENSP00000409612 | ENSP00000343657 | ENSP00000359680 |
| ENSP00000290597 | ENSP00000275605 | ENSP00000285093 | ENSP00000226840 | ENSP00000247194 |
| ENSP00000357920 | ENSP00000257549 | ENSP00000325136 | ENSP00000263035 | ENSP00000225740 |
| ENSP00000342557 | ENSP00000341117 | ENSP00000333664 | ENSP00000222673 | ENSP00000366030 |
| ENSP00000354347 | ENSP00000280706 | ENSP00000360968 | ENSP00000335304 | ENSP00000280097 |
| ENSP00000253778 | ENSP00000302393 | ENSP00000334246 | ENSP00000222214 | ENSP00000291670 |
| ENSP00000268251 | ENSP00000229319 | ENSP00000241052 | ENSP00000263182 | ENSP00000266736 |
| ENSP00000231420 | ENSP00000280704 | ENSP00000294973 | ENSP00000196061 | ENSP00000267845 |
| ENSP00000302620 | ENSP00000327070 | ENSP00000250018 | ENSP00000282903 | ENSP00000261208 |
| ENSP00000256999 | ENSP00000348234 | ENSP00000329093 | ENSP00000223127 | ENSP00000354511 |
| ENSP00000301776 | ENSP00000250535 | ENSP00000265605 | ENSP00000335261 | ENSP00000370571 |
| ENSP00000263080 | ENSP00000333666 | ENSP00000370639 | ENSP00000377040 | ENSP00000376776 |
| ENSP00000377696 | ENSP00000355084 | ENSP00000013222 | ENSP00000252599 | ENSP00000263321 |
| ENSP00000350928 | ENSP00000365693 | ENSP00000250615 | ENSP00000354960 | ENSP00000269582 |
| ENSP00000259271 | ENSP00000333212 | ENSP00000264170 | ENSP00000333534 | ENSP00000261755 |
| ENSP00000350136 | ENSP00000222382 | ENSP00000205402 | ENSP00000221307 | ENSP00000372112 |
| ENSP00000414330 | ENSP00000222982 | ENSP00000359991 | ENSP00000248041 | ENSP00000392762 |
| ENSP00000175506 | ENSP00000337450 | ENSP00000297283 | ENSP00000321821 | ENSP00000340200 |
| ENSP00000209668 | ENSP00000311095 | ENSP00000412189 | ENSP00000285979 | ENSP00000369050 |
| ENSP00000378359 | ENSP00000360991 | ENSP00000360317 | ENSP00000360372 | ENSP00000342007 |
| ENSP00000296412 | ENSP00000221700 | ENSP00000260682 | ENSP00000252945 | ENSP00000332679 |

## 6. Metabolism of other amino acids

|              |              |              |              |              |
|--------------|--------------|--------------|--------------|--------------|
| CID000444493 | CID000005950 | CID000119033 | CID000013818 | CID000003414 |
| CID000005960 | CID000001099 | CID000000768 | CID000000533 | CID005462314 |
| CID000644066 | CID000005862 | CID000000602 | CID000011648 | CID000151926 |
| CID000000239 | CID000000186 | CID000011128 | CID056928068 | CID000162204 |

|                 |                 |                 |                 |                 |
|-----------------|-----------------|-----------------|-----------------|-----------------|
| CID000092753    | CID000001123    | CID000006406    | CID000105024    | CID006337958    |
| CID000001174    | CID000072886    | CID000440104    | CID000001090    | CID014647097    |
| CID000006274    | CID000107812    | CID000161355    | CID000025076    | CID000007405    |
| CID000000868    | CID000160226    | CID000656516    | CID000147004    | CID000449517    |
| CID000001102    | CID001549097    | CID000441467    | CID049787000    | CID000115098    |
| CID000000119    | CID000006058    | CID000008794    | CID000001089    | CID000440667    |
| CID000000867    | CID000068340    | CID000005961    | CID000441455    | CID000065523    |
| CID000000649    | CID053297338    | CID000023327    | CID000440764    | CID024892797    |
| CID000000118    | CID000007866    | CID000449538    | CID053297413    | CID011020241    |
| CID000001103    | CID000068759    | CID000145815    | CID000091580    | CID000065359    |
| CID000010110    | CID000000363    | CID011006912    | CID000161597    | CID000123938    |
| CID000006613    | CID000031257    | CID005496796    | CID000000222    | CID000439498    |
| CID009543026    | CID000000750    | CID000006322    | CID000005951    | CID000000273    |
| CID000000428    | CID000001005    | CID000006262    | CID000006140    | CID000000051    |
| CID000068152    | CID000000177    | CID000001045    | CID000006057    | CID000000175    |
| CID000076406    | CID000439167    | CID000071082    | CID000006267    | CID004369587    |
| CID000112071    | CID000000297    | CID000012326    | CID000006287    | CID000073491    |
| CID000000111    | CID000439811    | CID000439402    | CID000000611    | CID000097588    |
| CID000041634    | CID000000490    | CID000440046    | CID000006306    | CID000000546    |
| CID000001066    | CID000000339    | CID000000558    | CID000000713    | CID000089954    |
| CID000000075    | CID000091619    | CID000005884    | CID000001647    | CID000001060    |
| CID011966171    | CID000003857    | CID000005885    | CID000124886    | CID000033032    |
| CID000001678    | CID000440756    |                 |                 |                 |
| ENSP00000406157 | ENSP00000345023 | ENSP00000366927 | ENSP00000262430 | ENSP00000256594 |
| ENSP00000355536 | ENSP00000300738 | ENSP00000345774 | ENSP00000259407 | ENSP00000358851 |
| ENSP00000302227 | ENSP00000251810 | ENSP00000255084 | ENSP00000250535 | ENSP00000256593 |
| ENSP00000260508 | ENSP00000234111 | ENSP00000387123 | ENSP00000362888 | ENSP00000381607 |
| ENSP00000013222 | ENSP00000346103 | ENSP00000346827 | ENSP00000248923 | ENSP00000290765 |
| ENSP00000357882 | ENSP00000262746 | ENSP00000261733 | ENSP00000381340 | ENSP00000295256 |
| ENSP00000367893 | ENSP00000301522 | ENSP00000225740 | ENSP00000338964 | ENSP00000233714 |
| ENSP00000254663 | ENSP00000298510 | ENSP00000293217 | ENSP00000292823 | ENSP00000010404 |
| ENSP00000262027 | ENSP00000368646 | ENSP00000348775 | ENSP00000368439 | ENSP00000265498 |
| ENSP00000282276 | ENSP00000265462 | ENSP00000242592 | ENSP00000260585 | ENSP00000226299 |
| ENSP00000301776 | ENSP00000342026 | ENSP00000231887 | ENSP00000229266 | ENSP00000300060 |
| ENSP00000318868 | ENSP00000253063 | ENSP00000370023 | ENSP00000265174 | ENSP00000295304 |
| ENSP00000333667 | ENSP00000407375 | ENSP00000357535 | ENSP00000358727 | ENSP00000275428 |
| ENSP00000277865 | ENSP00000374265 | ENSP00000359211 | ENSP00000335620 | ENSP00000385746 |
| ENSP00000327589 | ENSP00000373477 | ENSP00000324343 | ENSP00000420168 | ENSP00000352706 |
| ENSP00000317379 | ENSP00000392398 | ENSP00000276651 | ENSP00000211122 | ENSP00000307252 |
| ENSP00000310447 | ENSP00000354581 | ENSP00000268251 | ENSP00000359998 | ENSP00000325548 |
| ENSP00000228476 | ENSP00000354677 | ENSP00000350928 | ENSP00000284562 | ENSP00000351682 |
| ENSP00000260985 | ENSP00000221130 | ENSP00000259271 | ENSP00000311469 | ENSP00000267085 |
| ENSP00000331897 | ENSP00000360688 | ENSP00000253799 | ENSP00000241337 | ENSP00000282538 |
| ENSP00000270776 | ENSP00000272425 | ENSP00000312326 | ENSP00000215780 | ENSP00000366156 |
| ENSP00000377192 |                 |                 |                 |                 |

## 7. Glycan biosynthesis and metabolism

|              |              |              |              |              |
|--------------|--------------|--------------|--------------|--------------|
| CID000018396 | CID000439184 | CID024892725 | CID000165130 | CID005496796 |
| CID024892715 | CID000165007 | CID024892739 | CID000151104 | CID005280700 |

|                 |                 |                 |                 |                 |
|-----------------|-----------------|-----------------|-----------------|-----------------|
| CID024892719    | CID000449538    | CID000445070    | CID000010214    | CID000644109    |
| CID024892721    | CID011006912    | CID000006176    | CID000159296    | CID000121966    |
| CID000445675    | CID000000175    |                 |                 |                 |
| ENSP00000264228 | ENSP00000320965 | ENSP00000317027 | ENSP00000354960 | ENSP00000268695 |
| ENSP00000311888 | ENSP00000353910 | ENSP00000223122 | ENSP00000361302 | ENSP00000308107 |
| ENSP00000239891 | ENSP00000360644 | ENSP00000269195 | ENSP00000261534 | ENSP00000220244 |
| ENSP00000417764 | ENSP00000169298 | ENSP00000355632 | ENSP00000322300 | ENSP00000266031 |
| ENSP00000262374 | ENSP00000355273 | ENSP00000376465 | ENSP00000266712 | ENSP00000350387 |
| ENSP00000307423 | ENSP00000376472 | ENSP00000259056 | ENSP00000364902 | ENSP00000223026 |
| ENSP00000345270 | ENSP00000295770 | ENSP00000348668 | ENSP00000339613 | ENSP00000345849 |
| ENSP00000264968 | ENSP00000361667 | ENSP00000265000 | ENSP00000222725 | ENSP00000247933 |
| ENSP00000338487 | ENSP00000318147 | ENSP00000252318 | ENSP00000349490 | ENSP00000029410 |
| ENSP00000281923 | ENSP00000357453 | ENSP00000380488 | ENSP00000307971 | ENSP00000368496 |
| ENSP00000391227 | ENSP00000348959 | ENSP00000297107 | ENSP00000295571 | ENSP00000363590 |
| ENSP00000266483 | ENSP00000360645 | ENSP00000364150 | ENSP00000362824 | ENSP00000254190 |
| ENSP00000310120 | ENSP00000363452 | ENSP00000376570 | ENSP00000385478 | ENSP00000243776 |
| ENSP00000380793 | ENSP00000261483 | ENSP00000288988 | ENSP00000307875 | ENSP00000302629 |
| ENSP00000333813 | ENSP00000353655 | ENSP00000344260 | ENSP00000230053 | ENSP00000035307 |
| ENSP00000299626 | ENSP00000340466 | ENSP00000336729 | ENSP00000265471 | ENSP00000295588 |
| ENSP00000369055 | ENSP00000306920 | ENSP00000329654 | ENSP00000344125 | ENSP00000365172 |
| ENSP00000369820 | ENSP00000364782 | ENSP00000227756 | ENSP00000355559 | ENSP00000261381 |
| ENSP00000216452 | ENSP00000233840 | ENSP00000156626 | ENSP00000331258 | ENSP00000017003 |
| ENSP00000420037 | ENSP00000294064 | ENSP00000225276 | ENSP00000302728 | ENSP00000362207 |
| ENSP00000379680 | ENSP00000395473 | ENSP00000345477 | ENSP00000369442 | ENSP00000276055 |
| ENSP00000390784 | ENSP00000285599 | ENSP00000227495 | ENSP00000264914 | ENSP00000333947 |
| ENSP00000341562 | ENSP00000267978 | ENSP00000266383 | ENSP00000230036 | ENSP00000305725 |
| ENSP00000329214 | ENSP00000367343 | ENSP00000328277 | ENSP00000225609 | ENSP00000258711 |
| ENSP00000367446 | ENSP00000314508 | ENSP00000305603 | ENSP00000265012 | ENSP00000317404 |
| ENSP00000002596 | ENSP00000002165 | ENSP00000252675 | ENSP00000316173 | ENSP00000305595 |
| ENSP00000330606 | ENSP00000363603 | ENSP00000286955 | ENSP00000249005 | ENSP00000321874 |
| ENSP00000261374 | ENSP00000268097 | ENSP00000262915 | ENSP00000352144 | ENSP00000319636 |
| ENSP00000284110 | ENSP00000261416 | ENSP00000223127 | ENSP00000375748 | ENSP00000309270 |
| ENSP00000354213 | ENSP00000337854 | ENSP00000252599 | ENSP00000323479 | ENSP00000359131 |
| ENSP00000264595 | ENSP00000356404 | ENSP00000220562 | ENSP00000379353 | ENSP00000218516 |
| ENSP00000365920 |                 |                 |                 |                 |

## 8. Metabolism of cofactors and vitamins

|              |              |              |              |              |
|--------------|--------------|--------------|--------------|--------------|
| CID000006057 | CID005280839 | CID000440901 | CID010261389 | CID000119055 |
| CID000000135 | CID005280845 | CID000193577 | CID000115084 | CID000442163 |
| CID006440013 | CID000441209 | CID000000005 | CID000000437 | CID000128973 |
| CID000012039 | CID011954010 | CID000005885 | CID000579061 | CID000169508 |
| CID000445995 | CID011954011 | CID000001110 | CID000000434 | CID000000666 |
| CID000447277 | CID000092094 | CID000005960 | CID057339263 | CID000065074 |
| CID005280346 | CID005282350 | CID000000668 | CID000087642 | CID000121885 |
| CID000444539 | CID044140569 | CID000444972 | CID000159296 | CID000440840 |
| CID000000780 | CID023724601 | CID000000936 | CID000000239 | CID000444331 |
| CID000637542 | CID023724602 | CID000001032 | CID000001174 | CID000448839 |
| CID005280374 | CID024883454 | CID000000937 | CID000000049 | CID000440843 |
| CID000189062 | CID010364451 | CID000000119 | CID000006287 | CID000443142 |

|              |              |              |              |              |
|--------------|--------------|--------------|--------------|--------------|
| CID000000979 | CID000479503 | CID000014180 | CID000000649 | CID046173804 |
| CID005280413 | CID005462210 | CID000165490 | CID000439251 | CID000446357 |
| CID005280473 | CID046173938 | CID000005570 | CID000439322 | CID000000171 |
| CID005280483 | CID046173940 | CID000072924 | CID000006613 | CID016061579 |
| CID000014985 | CID021587070 | CID000439383 | CID000444485 | CID045266867 |
| CID000092729 | CID010902296 | CID000099456 | CID000000038 | CID053356704 |
| CID000000955 | CID010946654 | CID000121991 | CID000115254 | CID012463319 |
| CID000168718 | CID005283544 | CID000439476 | CID000000111 | CID013344694 |
| CID071448891 | CID005283546 | CID000444266 | CID000041634 | CID010220406 |
| CID005280585 | CID044237185 | CID005280451 | CID000440217 | CID000638015 |
| CID000000671 | CID013850222 | CID000439700 | CID000440304 | CID000445354 |
| CID006443777 | CID000091443 | CID000000457 | CID000131204 | CID000444795 |
| CID005280650 | CID000439175 | CID000095155 | CID049859611 | CID005280382 |
| CID005280651 | CID000122347 | CID000439886 | CID000005962 | CID005280489 |
| CID005280760 | CID000098792 | CID000069371 | CID000001176 | CID005280490 |
| CID005280776 | CID009825434 | CID000439924 | CID000171548 | CID005280531 |
| CID014556929 | CID000439237 | CID000440020 | CID000000652 | CID005459829 |
| CID005280826 | CID000006037 | CID000001066 | CID003082140 | CID005281877 |
| CID005280827 | CID000000530 | CID000068499 | CID000000173 | CID000446798 |
| CID005280828 | CID000000143 | CID000000796 | CID071448890 | CID000449171 |
| CID005280829 | CID000005892 | CID000161233 | CID000000643 | CID006438629 |
| CID005280831 | CID000001051 | CID000069698 | CID000000385 | CID006437063 |
| CID005280832 | CID000001060 | CID000440810 | CID000440721 | CID005363137 |
| CID005280834 | CID000000750 | CID000440932 | CID005326875 | CID006436082 |
| CID005280835 | CID000001132 | CID054723871 | CID000086492 | CID005289090 |
| CID005280836 | CID000005862 | CID000070703 | CID000083833 | CID000033032 |
| CID005280837 | CID000439168 | CID000000942 | CID000083863 | CID000004973 |
| CID005287432 | CID000001130 | CID054693777 | CID023724672 | CID000006288 |
| CID005280352 | CID000001131 | CID000001050 | CID000006112 | CID024892716 |
| CID005280353 | CID000000777 | CID000000756 | CID000007339 | CID000000137 |
| CID046173705 | CID000000511 | CID000122357 | CID000133246 | CID046173785 |
| CID000439303 | CID000161500 | CID000001054 | CID000044257 | CID023724514 |
| CID000001021 | CID000001136 | CID000001052 | CID000000978 | CID023724516 |
| CID024836902 | CID000001137 | CID000001055 | CID000065253 | CID011953957 |
| CID000000788 | CID000000216 | CID000001053 | CID000000170 | CID005281957 |
| CID000001179 | CID000000217 | CID000006723 | CID005462234 | CID000443429 |
| CID000121893 | CID000443201 | CID000151228 | CID000000218 | CID003246323 |
| CID000439664 | CID003080609 | CID000439464 | CID000196146 | CID000023925 |
| CID000004971 | CID000597195 | CID000449304 | CID005460020 | CID015719509 |
| CID005280516 | CID046942369 | CID000440474 | CID000196427 | CID015775275 |
| CID000072423 | CID000066762 | CID000493570 | CID000008434 | CID005323510 |
| CID000119412 | CID000643975 | CID000006912 | CID005280816 | CID046174034 |
| CID000439833 | CID000006830 | CID014080393 | CID005280817 | CID023657843 |
| CID000000321 | CID000643976 | CID000446013 | CID000026818 | CID053297369 |
| CID000440035 | CID000439184 | CID005326566 | CID005280818 | CID046906047 |
| CID000129297 | CID000114935 | CID000000711 | CID005280819 | CID011953882 |
| CID000440377 | CID011953856 | CID000000675 | CID011953875 | CID000068271 |
| CID000440775 | CID046173745 | CID000168989 | CID005280865 | CID005280930 |

|                 |                 |                 |                 |                 |
|-----------------|-----------------|-----------------|-----------------|-----------------|
| CID000440776    | CID000160433    | CID000001112    |                 |                 |
| ENSP00000378426 | ENSP00000292180 | ENSP00000239231 | ENSP00000346768 | ENSP00000264613 |
| ENSP00000353998 | ENSP00000365773 | ENSP00000367727 | ENSP00000251566 | ENSP00000273550 |
| ENSP00000319788 | ENSP00000363832 | ENSP00000278618 | ENSP00000305221 | ENSP00000313691 |
| ENSP00000254759 | ENSP00000225573 | ENSP00000356905 | ENSP00000304811 | ENSP00000265523 |
| ENSP00000288532 | ENSP00000291565 | ENSP00000322276 | ENSP00000274278 | ENSP00000343943 |
| ENSP00000348234 | ENSP00000215904 | ENSP00000343190 | ENSP00000282507 | ENSP00000261643 |
| ENSP00000233838 | ENSP00000352782 | ENSP00000280701 | ENSP00000265403 | ENSP00000246337 |
| ENSP00000371236 | ENSP00000354532 | ENSP00000338387 | ENSP00000341045 | ENSP00000386284 |
| ENSP00000236959 | ENSP00000235628 | ENSP00000309463 | ENSP00000320401 | ENSP00000357775 |
| ENSP00000315644 | ENSP00000352904 | ENSP00000285930 | ENSP00000334276 | ENSP00000326579 |
| ENSP00000318868 | ENSP00000339479 | ENSP00000370571 | ENSP00000369050 | ENSP00000355890 |
| ENSP00000333667 | ENSP00000257770 | ENSP00000250018 | ENSP00000342007 | ENSP00000265512 |
| ENSP00000273588 | ENSP00000314649 | ENSP00000329093 | ENSP00000332679 | ENSP00000307607 |
| ENSP00000355536 | ENSP00000373860 | ENSP00000290349 | ENSP00000360317 | ENSP00000258168 |
| ENSP00000291670 | ENSP00000299964 | ENSP00000290354 | ENSP00000260682 | ENSP00000334128 |
| ENSP00000379108 | ENSP00000222553 | ENSP00000326219 | ENSP00000285979 | ENSP00000297785 |
| ENSP00000377617 | ENSP00000378782 | ENSP00000234454 | ENSP00000360372 | ENSP00000249750 |
| ENSP00000365775 | ENSP00000226279 | ENSP00000281243 | ENSP00000252945 | ENSP00000332256 |
| ENSP00000319170 | ENSP00000354387 | ENSP00000261326 | ENSP00000333534 | ENSP00000295802 |
| ENSP00000377083 | ENSP00000168977 | ENSP00000378890 | ENSP00000333212 | ENSP00000337224 |
| ENSP00000258874 | ENSP00000287713 | ENSP00000254908 | ENSP00000222382 | ENSP00000228027 |
| ENSP00000356290 | ENSP00000340523 | ENSP00000280362 | ENSP00000222982 | ENSP00000262340 |
| ENSP00000362249 | ENSP00000265016 | ENSP00000362344 | ENSP00000337450 | ENSP00000302728 |
| ENSP00000346921 | ENSP00000230792 | ENSP00000209668 | ENSP00000311095 | ENSP00000369442 |
| ENSP00000346577 | ENSP00000401508 | ENSP00000378359 | ENSP00000360991 | ENSP00000309259 |
| ENSP00000267584 | ENSP00000326424 | ENSP00000296412 | ENSP00000221700 | ENSP00000216117 |
| ENSP00000298545 | ENSP00000359211 | ENSP00000343838 | ENSP00000221307 | ENSP00000219700 |
| ENSP00000355587 | ENSP00000324343 | ENSP00000304845 | ENSP00000248041 | ENSP00000350265 |
| ENSP00000353165 | ENSP00000276651 | ENSP00000418532 | ENSP00000321821 | ENSP00000369456 |
| ENSP00000363205 | ENSP00000322991 | ENSP00000362508 | ENSP00000360968 | ENSP00000258662 |
| ENSP00000375881 | ENSP00000267085 | ENSP00000362513 | ENSP00000334246 | ENSP00000263368 |
| ENSP00000295463 | ENSP00000282538 | ENSP00000303174 | ENSP00000381206 | ENSP00000270593 |
| ENSP00000295453 | ENSP00000302108 | ENSP00000362525 | ENSP00000318631 | ENSP00000288014 |
| ENSP00000363965 | ENSP00000313377 | ENSP00000362549 | ENSP00000306606 | ENSP00000370718 |
| ENSP00000327557 | ENSP00000218758 | ENSP00000272065 | ENSP00000256997 | ENSP00000323036 |

## 9. Metabolism of terpenoids and polyketides

|              |              |              |              |              |
|--------------|--------------|--------------|--------------|--------------|
| CID000644066 | CID000010582 | CID000441005 | CID016667385 | CID000189062 |
| CID000638011 | CID005281994 | CID000003503 | CID000029746 | CID000006057 |
| CID000637566 | CID010953718 | CID000073170 | CID006365330 | CID000000979 |
| CID009549320 | CID000173183 | CID000073145 | CID009855795 | CID023724518 |
| CID009549326 | CID000115196 | CID000259846 | CID005460659 | CID000443709 |
| CID000643820 | CID011988279 | CID000092097 | CID011241545 | CID000443710 |
| CID005275520 | CID023724579 | CID000161937 | CID025244915 | CID010100825 |
| CID000010402 | CID023724581 | CID005281517 | CID056928117 | CID006436726 |
| CID009549319 | CID023724582 | CID005281519 | CID044237280 | CID006447533 |
| CID009549328 | CID023724583 | CID005281520 | CID056928122 | CID000000019 |
| CID000092753 | CID023724584 | CID000442393 | CID025245907 | CID000012039 |

|                 |                 |                 |                 |                 |
|-----------------|-----------------|-----------------|-----------------|-----------------|
| CID003036931    | CID023724585    | CID014355861    | CID010895555    | CID000000338    |
| CID011966111    | CID023724586    | CID011052747    | CID056928123    | CID071448900    |
| CID000441110    | CID023724590    | CID000122283    | CID006476390    | CID000443765    |
| CID046173788    | CID023724591    | CID000643976    | CID010003607    | CID000444493    |
| CID000441109    | CID023724592    | CID000000711    | CID012313974    | CID000369312    |
| CID000065533    | CID023724593    | CID000439279    | CID024873746    | CID000031253    |
| CID000443211    | CID023724594    | CID000002758    | CID056927728    | CID000440917    |
| CID000443210    | CID046173984    | CID000442495    | CID025001002    | CID006440982    |
| CID000121966    | CID046173985    | CID000016724    | CID056927810    | CID010522005    |
| CID016757114    | CID056928129    | CID000443158    | CID012302184    | CID023724755    |
| CID024892770    | CID005280489    | CID000443178    | CID025203718    | CID000092180    |
| CID000439292    | CID006449797    | CID011073781    | CID000005997    | CID000100221    |
| CID000441096    | CID000005957    | CID000016441    | CID000019212    | CID000061020    |
| CID000008369    | CID000006022    | CID000006654    | CID000439423    | CID000688597    |
| CID025150860    | CID000006031    | CID000330573    | CID000439743    | CID005280589    |
| CID056927715    | CID000034755    | CID013935024    | CID005281523    | CID023724748    |
| CID056927946    | CID000006083    | CID000638072    | CID015942885    | CID023724749    |
| CID000447277    | CID000008629    | CID005459811    | CID014017685    | CID000024405    |
| CID000445713    | CID000000175    | CID000194140    | CID013939876    | CID011561034    |
| CID000445070    | CID000000190    | CID000114857    | CID023724769    | CID011132720    |
| CID005280413    | CID000439176    | CID000656496    | CID005275507    | CID010357552    |
| CID005280598    | CID023724459    | CID000168951    | CID005275508    | CID021896400    |
| CID005280650    | CID000000647    | CID000164874    | CID015081546    | CID000445995    |
| CID005280651    | CID000449093    | CID000092155    | CID005459948    | CID000439250    |
| CID005280700    | CID000099478    | CID000000355    | CID006324616    | CID000026447    |
| CID014556929    | CID005461055    | CID000445805    | CID000127115    | CID000094221    |
| CID005462210    | CID000194139    | CID015519422    | CID000443628    | CID000161276    |
| CID006438372    | CID005461146    | CID000036143    | CID046173796    | CID000439711    |
| ENSP00000231887 | ENSP00000366927 | ENSP00000358414 | ENSP00000228510 | ENSP00000356015 |
| ENSP00000168216 | ENSP00000345774 | ENSP00000287936 | ENSP00000357452 | ENSP00000265838 |
| ENSP00000285093 | ENSP00000255084 | ENSP00000387654 | ENSP00000361845 | ENSP00000322706 |
| ENSP00000325136 | ENSP00000387123 | ENSP00000343552 | ENSP00000301012 | ENSP00000220584 |
| ENSP00000333664 | ENSP00000346827 | ENSP00000349078 | ENSP00000370748 | ENSP00000358931 |
| ENSP00000381654 | ENSP00000261733 | ENSP00000282841 | ENSP00000277517 | ENSP00000280605 |
| ENSP00000363614 | ENSP00000264228 | ENSP00000303423 | ENSP00000260682 | ENSP00000358033 |
| ENSP00000370023 | ENSP00000274192 | ENSP00000246166 | ENSP00000360372 | ENSP00000365388 |
| ENSP00000357535 | ENSP00000321810 | ENSP00000353104 | ENSP00000357480 | ENSP00000265896 |
| ENSP00000261296 |                 |                 |                 |                 |

## 10. Biosynthesis of other secondary metabolites

|              |              |              |              |              |
|--------------|--------------|--------------|--------------|--------------|
| CID000000760 | CID000006287 | CID011953794 | CID005281426 | CID005281672 |
| CID000001188 | CID000065536 | CID000439440 | CID000637563 | CID005280362 |
| CID000064959 | CID000092136 | CID000439467 | CID000008815 | CID005280417 |
| CID000002153 | CID000011082 | CID000121966 | CID000003314 | CID005280442 |
| CID000005429 | CID000440722 | CID024892737 | CID000007127 | CID000162350 |
| CID000002519 | CID000440723 | CID000440194 | CID000853433 | CID005280459 |
| CID000004687 | CID000071724 | CID000439292 | CID000637776 | CID005280637 |
| CID000068374 | CID000160139 | CID000008629 | CID005281871 | CID005280666 |
| CID000091611 | CID000441084 | CID000445675 | CID044229078 | CID005280681 |



|              |              |               |              |              |
|--------------|--------------|---------------|--------------|--------------|
| CID000070639 | CID000441328 | CID000036294  | CID005282094 | CID005280682 |
| CID000080220 | CID000446570 | CID000169075  | CID005282095 | CID005280746 |
| CID000069726 | CID000439168 | CID000072396  | CID005282096 | CID005280804 |
| CID000079437 | CID000087642 | CID000072392  | CID000068148 | CID005280805 |
| CID000181740 | CID000033032 | CID003081544  | CID014777879 | CID005281666 |
| CID000011719 | CID000145742 | CID000008378  | CID015241070 | CID005281953 |
| CID000007293 | CID000439322 | CID000033042  | CID046173191 | CID005282102 |
| CID000108214 | CID000115254 | CID000006032  | CID044237218 | CID005282150 |
| CID000088299 | CID000193305 | CID000203442  | CID005280343 | CID005282152 |
| CID000444493 | CID000193475 | CID000072395  | CID005280441 | CID005282154 |
| CID000644066 | CID000440162 | CID023724518  | CID005280443 | CID005282155 |
| CID005280389 | CID000441128 | CID010583108  | CID005280445 | CID005316673 |
| CID000104940 | CID000441133 | CID000194428  | CID005280863 | CID000006047 |
| CID002724360 | CID000003893 | CID046173948  | CID000160487 | CID000005610 |
| CID020832874 | CID000001028 | CID000123865  | CID000005154 | CID000002353 |
| CID021596453 | CID054675768 | CID000072394  | CID005459910 | CID005288826 |
| CID000025102 | CID015940185 | CID000197189  | CID005460444 | CID005459823 |
| CID046926144 | CID054706138 | CID016757114  | CID005324289 | CID000072309 |
| CID000034755 | CID054691343 | CID000041774  | CID005284371 | CID000439653 |
| CID000001060 | CID054691348 | CID000443629  | CID005462306 | CID000072301 |
| CID000005960 | CID000443861 | CID000000887  | CID000159911 | CID000021171 |
| CID000001117 | CID000000798 | CID000001150  | CID000441066 | CID000000681 |
| CID000006322 | CID000444150 | CID000161276  | CID000441069 | CID000440113 |
| CID000005951 | CID000447277 | CID000006140  | CID000004680 | CID000119219 |
| CID000006057 | CID000006305 | CID006440013  | CID000441257 | CID000440583 |
| CID000006288 | CID000000227 | CID000001102  | CID000441259 | CID000440584 |
| CID000010238 | CID000012039 | CID011966126  | CID000006167 | CID000440586 |
| CID000439235 | CID000445344 | CID011966129  | CID000009651 | CID005408233 |
| CID000000979 | CID000005793 | CID011966120  | CID000441593 | CID000004970 |
| CID005460143 | CID000005958 | CID000444539  | CID000072378 | CID005460042 |
| CID006400657 | CID000065533 | CID0000637775 | CID000010219 | CID000019009 |
| CID000152441 | CID000000892 | CID006444037  | CID000275196 | CID000440927 |
| CID000000355 | CID000019648 | CID001549095  | CID000442330 | CID005280555 |
| CID000440179 | CID000443211 | CID005280372  | CID000443421 | CID000641301 |
| CID000036143 | CID000439294 | CID000637542  | CID000165003 | CID005280802 |
| CID025201122 | CID000443210 | CID001794426  | CID000398937 | CID000446834 |
| CID000005862 | CID000439408 | CID000637511  | CID009838394 | CID000062453 |
| CID000079038 | CID000160603 | CID005280385  | CID000008768 | CID000000323 |
| CID000446220 | CID000001194 | CID000689043  | CID000160500 | CID000000368 |
| CID000010726 | CID000643327 | CID000445858  | CID000005962 | CID000000412 |
| CID000174174 | CID005280906 | CID000439514  | CID000001045 | CID000101615 |
| CID000000273 | CID000010198 | CID005316860  | CID000000997 | CID000011388 |
| CID000008082 | CID000440932 | CID005280460  | CID000000937 | CID000051683 |
| CID000154417 | CID000002181 | CID000637540  | CID000006306 | CID000644020 |
| CID000439791 | CID000068161 | CID005280507  | CID000439227 | CID000188288 |
| CID000439954 | CID049787007 | CID005280535  | CID024771808 | CID000443848 |
| CID000638024 | CID000439316 | CID005280536  | CID000008424 | CID000443849 |
| CID000006106 | CID000001669 | CID011953815  | CID000089594 | CID005380876 |

|                 |                 |                 |                 |                 |
|-----------------|-----------------|-----------------|-----------------|-----------------|
| CID000000049    | CID000161255    | CID005371769    | CID000000051    | CID024883456    |
| CID000000070    | CID025245127    | CID003295299    | CID000000970    | CID025203496    |
| CID000439286    | CID000162602    | CID000656506    | CID000000750    | CID011298145    |
| CID000000473    | CID000147311    | CID000656524    | CID000643976    | CID000228215    |
| CID000656497    | CID000006137    | CID000656534    | CID000006262    | CID022266650    |
| CID000099478    | CID000005950    | CID000656538    | CID000000311    | CID002724505    |
| CID000068841    | CID003036931    | CID000656567    | CID000439183    | CID046173877    |
| CID000123895    | CID000001183    | CID000194140    | CID000009750    | CID000445713    |
| CID000071082    |                 |                 |                 |                 |
| ENSP00000369050 | ENSP00000311095 | ENSP00000348234 | ENSP00000252804 | ENSP00000225371 |
| ENSP00000342007 | ENSP00000360991 | ENSP00000303077 | ENSP00000302728 | ENSP00000262290 |
| ENSP00000332679 | ENSP00000221700 | ENSP00000359539 | ENSP00000369442 | ENSP00000348645 |
| ENSP00000360317 | ENSP00000221307 | ENSP00000245206 | ENSP00000342557 | ENSP00000222982 |
| ENSP00000260682 | ENSP00000248041 | ENSP00000346643 | ENSP00000253799 | ENSP00000337450 |
| ENSP00000285979 | ENSP00000321821 | ENSP00000290573 | ENSP00000312326 | ENSP00000228476 |
| ENSP00000360372 | ENSP00000360968 | ENSP00000292432 | ENSP00000340684 | ENSP00000360268 |
| ENSP00000252945 | ENSP00000334246 | ENSP00000223366 | ENSP00000367309 | ENSP00000269159 |
| ENSP00000333534 | ENSP00000286479 | ENSP00000371393 | ENSP00000370571 | ENSP00000261296 |
| ENSP00000333212 | ENSP00000265174 | ENSP00000262644 | ENSP00000263321 | ENSP00000322991 |
| ENSP00000222382 | ENSP00000406157 | ENSP00000408526 | ENSP00000354511 |                 |

## 11. Xenobiotics biodegradation and metabolism

|              |               |               |              |              |
|--------------|---------------|---------------|--------------|--------------|
| CID000000280 | CID000005054  | CID000000569  | CID000441164 | CID000000174 |
| CID000000996 | CID009543152  | CID0000003035 | CID000007929 | CID000006326 |
| CID005280366 | CID054675756  | CID0000003036 | CID000012105 | CID000006344 |
| CID000001060 | CID000007478  | CID000016323  | CID000007418 | CID000006325 |
| CID000444493 | CID000168718  | CID000007095  | CID000007237 | CID000006354 |
| CID000000177 | CID005280595  | CID000015625  | CID000006994 | CID000024726 |
| CID000000289 | CID000000104  | CID000000568  | CID000010722 | CID000643794 |
| CID000092133 | CID000176951  | CID000009216  | CID000008373 | CID000000011 |
| CID000000242 | CID000006926  | CID000006854  | CID000011476 | CID000000034 |
| CID000000019 | CID000440983  | CID000036187  | CID000000072 | CID000000033 |
| CID000092153 | CID000007413  | CID000063090  | CID000000240 | CID000000300 |
| CID003081383 | CID024798714  | CID000038439  | CID009543169 | CID000031373 |
| CID000000785 | CID000000135  | CID000038251  | CID000000244 | CID000006575 |
| CID005280361 | CID000000126  | CID000042540  | CID000007420 | CID000638186 |
| CID000000093 | CID000007469  | CID000029575  | CID000001140 | CID000643833 |
| CID005497143 | CID000006618  | CID000039929  | CID000000342 | CID000006338 |
| CID009543037 | CID0000080801 | CID000042128  | CID000002879 | CID000008259 |
| CID000000241 | CID000006623  | CID000051130  | CID000000101 | CID000028167 |
| CID000008404 | CID000031242  | CID000038199  | CID000440385 | CID000006597 |
| CID000011390 | CID005280500  | CID000051043  | CID000440399 | CID000006421 |
| CID000007322 | CID000006318  | CID000036231  | CID000006101 | CID000006407 |
| CID000006812 | CID000000051  | CID000036188  | CID011966300 | CID000006278 |
| CID000008420 | CID000000227  | CID000053036  | CID000007771 | CID000006365 |
| CID000006115 | CID000000338  | CID000035823  | CID009543293 | CID000024472 |
| CID000004650 | CID000000254  | CID000047650  | CID009543294 | CID000003469 |
| CID000000978 | CID000062348  | CID000038019  | CID009543296 | CID000000931 |
| CID000000086 | CID000008479  | CID000050891  | CID025021177 | CID000074128 |

|              |              |              |              |              |
|--------------|--------------|--------------|--------------|--------------|
| CID000001183 | CID000000991 | CID000040479 | CID000011318 | CID000440294 |
| CID000000980 | CID000000220 | CID000018636 | CID000006844 | CID000006998 |
| CID000001057 | CID000009395 | CID000092753 | CID005280688 | CID005280911 |
| CID000000370 | CID000000655 | CID000000527 | CID000007489 | CID000000584 |
| CID000000460 | CID000000654 | CID000007470 | CID000002336 | CID000007002 |
| CID000011914 | CID000008468 | CID000000340 | CID000000760 | CID000006738 |
| CID000439616 | CID000189003 | CID000007463 | CID000000283 | CID000020908 |
| CID000005800 | CID005280981 | CID000029587 | CID000000712 | CID000006195 |
| CID000011915 | CID009543219 | CID000009958 | CID000000757 | CID000007055 |
| CID000000359 | CID000007416 | CID000007809 | CID000000971 | CID000006201 |
| CID003505109 | CID000011473 | CID000011505 | CID000000868 | CID000007123 |
| CID000000403 | CID000012511 | CID000007725 | CID000000281 | CID000005788 |
| CID000007518 | CID000007505 | CID000066827 | CID015558498 | CID000007500 |
| CID000012793 | CID000002331 | CID000011087 | CID000006001 | CID000007410 |
| CID000010787 | CID000010742 | CID009543331 | CID000011285 | CID009543204 |
| CID000000378 | CID000011137 | CID000683563 | CID000007444 | CID000068490 |
| CID000000355 | CID000000998 | CID054731235 | CID004660280 | CID000443135 |
| CID000000372 | CID003081970 | CID000016487 | CID000069212 | CID000444972 |
| CID005280625 | CID009543026 | CID015608168 | CID000070758 | CID000000096 |
| CID005280679 | CID005280393 | CID005462303 | CID000001032 | CID000107689 |
| CID000019829 | CID005280398 | CID000008461 | CID000007501 | CID000006581 |
| CID000151426 | CID000006579 | CID000007261 | CID009543332 | CID000000780 |
| CID000001176 | CID000007855 | CID000008376 | CID000089594 | CID011094749 |
| CID000150833 | CID000007680 | CID000029574 | CID000008530 | CID000008640 |
| CID000007967 | CID000012122 | CID000037182 | CID000000362 | CID011954051 |
| CID000007965 | CID000011970 | CID000006593 | CID000002707 | CID011954053 |
| CID000007966 | CID000000999 | CID003036914 | CID000007961 | CID000108121 |
| CID000000564 | CID000008794 | CID000105131 | CID000007839 | CID003036760 |
| CID000007533 | CID000115084 | CID000047289 | CID000008663 | CID000007244 |
| CID000092886 | CID000108081 | CID000004095 | CID000007005 | CID000037456 |
| CID000000016 | CID000000437 | CID000003121 | CID000006366 | CID000037455 |
| CID000440918 | CID000104856 | CID000034312 | CID000006849 | CID000037786 |
| CID000014490 | CID000000438 | CID000083852 | CID000007808 | CID000025892 |
| CID000000196 | CID000104757 | CID000002555 | CID000028598 | CID000041322 |
| CID000013006 | CID000104756 | CID000003331 | CID000010667 | CID011954069 |
| CID000007768 | CID053297444 | CID000002771 | CID000011305 | CID000119521 |
| CID000008078 | CID000156652 | CID000099735 | CID000155957 | CID000006576 |
| CID000013017 | CID000183009 | CID000033676 | CID006378383 | CID000006577 |
| CID000079129 | CID000007847 | CID000107744 | CID010090750 | CID011954070 |
| CID005489029 | CID005288826 | CID000031515 | CID000114861 | CID011954072 |
| CID005360621 | CID000449459 | CID000096356 | CID000009533 | CID011954073 |
| CID021350391 | CID005284371 | CID000002907 | CID000099303 | CID000121997 |
| CID000010312 | CID000002554 | CID000015130 | CID000124143 | CID000151244 |
| CID000129274 | CID000003690 | CID005462508 | CID000161824 | CID000013350 |
| CID013103864 | CID000003676 | CID003036580 | CID000024415 | CID000009427 |
| CID000162180 | CID002733525 | CID003033895 | CID000087833 | CID000150856 |
| CID000162976 | CID002723601 | CID000091477 | CID000076543 | CID010037499 |
| CID010403174 | CID000003385 | CID000222865 | CID003015693 | CID000060837 |

|                 |                 |                 |                 |                 |
|-----------------|-----------------|-----------------|-----------------|-----------------|
| CID009944000    | CID000104842    | CID000005881    | CID009925873    | CID000005997    |
| CID005484731    | CID000443154    | CID000440483    | CID000667490    | CID000006128    |
| CID000104896    | CID000005790    | CID000441302    | CID000008642    | CID000006013    |
| CID000134466    | CID000060953    | CID000013472    | CID003034391    | CID003081384    |
| CID000135243    | CID000005386    | CID000160531    | CID000009321    | CID003034646    |
| CID000134459    | CID000018343    | CID000134970    | CID000005236    | CID000018209    |
| CID000173719    | CID010077584    | CID000005892    | CID000002265    | CID000014039    |
| CID006437068    | CID011756356    | CID000005885    | CID000003767    | CID000071602    |
| CID024892812    | CID003032417    | CID000005778    | CID000005922    | CID010091038    |
| CID003731686    | CID003031829    |                 |                 |                 |
| ENSP00000231887 | ENSP00000248041 | ENSP00000298545 | ENSP00000233714 | ENSP00000333212 |
| ENSP00000168216 | ENSP00000321821 | ENSP00000256722 | ENSP00000010404 | ENSP00000311095 |
| ENSP00000222214 | ENSP00000360968 | ENSP00000219302 | ENSP00000265498 | ENSP00000284562 |
| ENSP00000285093 | ENSP00000334246 | ENSP00000356785 | ENSP00000290349 | ENSP00000359998 |
| ENSP00000325136 | ENSP00000238618 | ENSP00000013034 | ENSP00000290354 | ENSP00000333534 |
| ENSP00000333664 | ENSP00000378161 | ENSP00000376886 | ENSP00000326219 | ENSP00000252945 |
| ENSP00000356015 | ENSP00000286479 | ENSP00000219479 | ENSP00000369927 | ENSP00000211122 |
| ENSP00000265838 | ENSP00000261755 | ENSP00000419851 | ENSP00000370254 | ENSP00000221307 |
| ENSP00000370023 | ENSP00000312606 | ENSP00000359211 | ENSP00000221403 | ENSP00000337450 |
| ENSP00000357535 | ENSP00000225740 | ENSP00000232607 | ENSP00000370129 | ENSP00000360372 |
| ENSP00000219054 | ENSP00000343838 | ENSP00000330032 | ENSP00000222002 | ENSP00000420168 |
| ENSP00000327453 | ENSP00000304845 | ENSP00000252029 | ENSP00000272167 | ENSP00000221700 |
| ENSP00000301956 | ENSP00000418532 | ENSP00000301634 | ENSP00000340684 | ENSP00000222982 |
| ENSP00000222381 | ENSP00000362508 | ENSP00000361289 | ENSP00000367309 | ENSP00000285979 |
| ENSP00000222572 | ENSP00000362513 | ENSP00000356853 | ENSP00000363832 | ENSP00000335620 |
| ENSP00000265627 | ENSP00000303174 | ENSP00000346155 | ENSP00000346901 | ENSP00000360991 |
| ENSP00000209668 | ENSP00000362525 | ENSP00000324343 | ENSP00000209929 | ENSP00000222382 |
| ENSP00000378359 | ENSP00000362549 | ENSP00000276651 | ENSP00000356729 | ENSP00000260682 |
| ENSP00000296412 | ENSP00000346768 | ENSP00000353720 | ENSP00000356723 | ENSP00000215780 |
| ENSP00000366927 | ENSP00000251566 | ENSP00000317842 | ENSP00000254090 | ENSP00000295256 |
| ENSP00000345774 | ENSP00000305221 | ENSP00000304782 | ENSP00000312304 | ENSP00000267584 |
| ENSP00000255084 | ENSP00000304811 | ENSP00000358421 | ENSP00000302728 | ENSP00000360317 |
| ENSP00000387123 | ENSP00000274278 | ENSP00000358424 | ENSP00000369442 | ENSP00000345023 |
| ENSP00000346827 | ENSP00000282507 | ENSP00000311469 | ENSP00000345096 | ENSP00000290765 |
| ENSP00000261733 | ENSP00000265403 | ENSP00000241337 | ENSP00000321584 | ENSP00000346577 |
| ENSP00000221730 | ENSP00000341045 | ENSP00000256594 | ENSP00000300738 | ENSP00000332679 |
| ENSP00000369050 | ENSP00000320401 | ENSP00000358851 | ENSP00000251810 | ENSP00000358727 |
| ENSP00000342007 | ENSP00000334276 | ENSP00000256593 | ENSP00000298556 | ENSP00000381607 |
| ENSP00000362249 |                 |                 |                 |                 |
